# Supplementary material
Source: Springer Nature journal article supplement (https://www.springermedizin.de/resource/supplementary/12883_2013_996_MOESM1_ESM.pdf/9456572)
Supplement: MOESM1 [file 9456572]

8132 hits in  
relevant databases

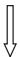

4272 duplicates

3860 potential relevant  
abstracts

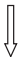

review of 2 independent  
researchers

749 abstracts were ordered as  
full-text publications

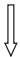

295 of these were publications  
with psychometric topics

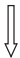

review of 2 independent  
researchers

120 relevant psychometric  
studies were included for  
analysis
